# Supplementary material
Source: Springer Nature journal article supplement (https://www.springermedizin.de/resource/supplementary/13256_2014_2950_MOESM3_ESM.pdf/9650890)

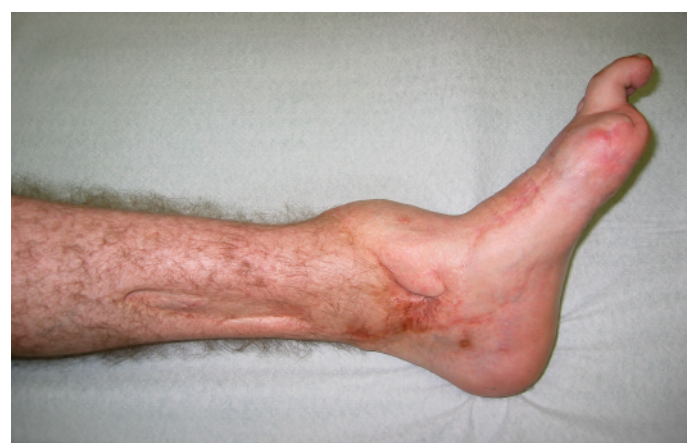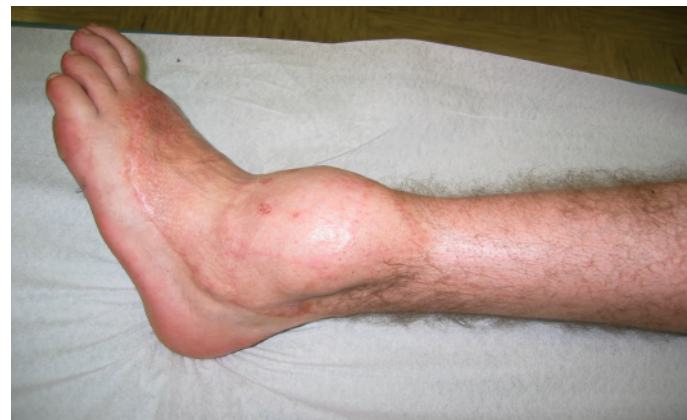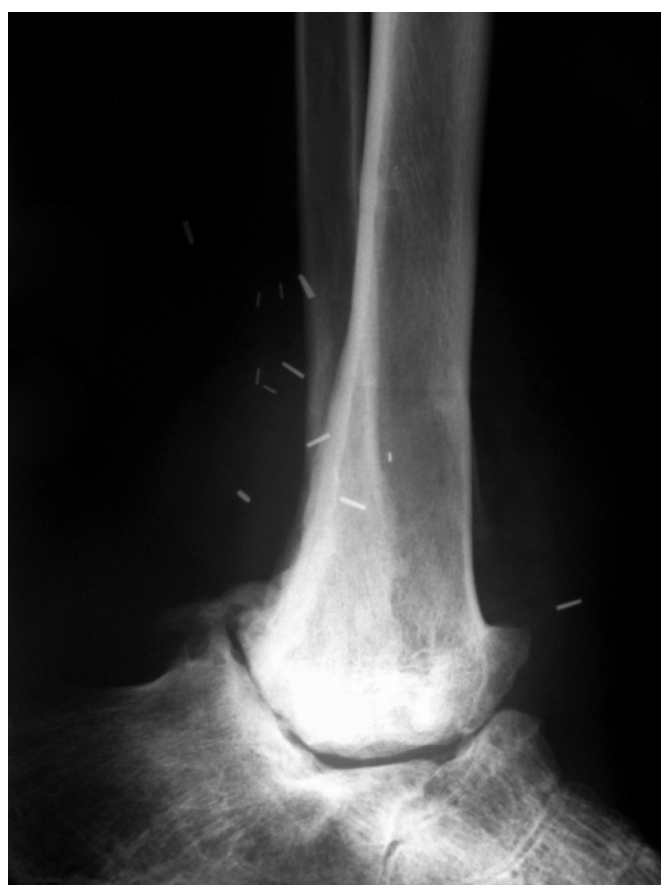

Supplement: MOESM3 [file 9650890]
